# Supplementary material for: Antiangiogenic Tyrosine Kinase Inhibitors have Differential Efficacy in Clear Cell Renal Cell Carcinoma in Bone
Source: PubMed Central journal article supplement (PMC11459607; doi:10.1158/2767-9764.crc-24-0304), 2024-10-08
Supplement: crc-24-0304_figure_s1_suppsf1.pdf [file crc-24-0304_figure_s1_suppsf1.pdf]

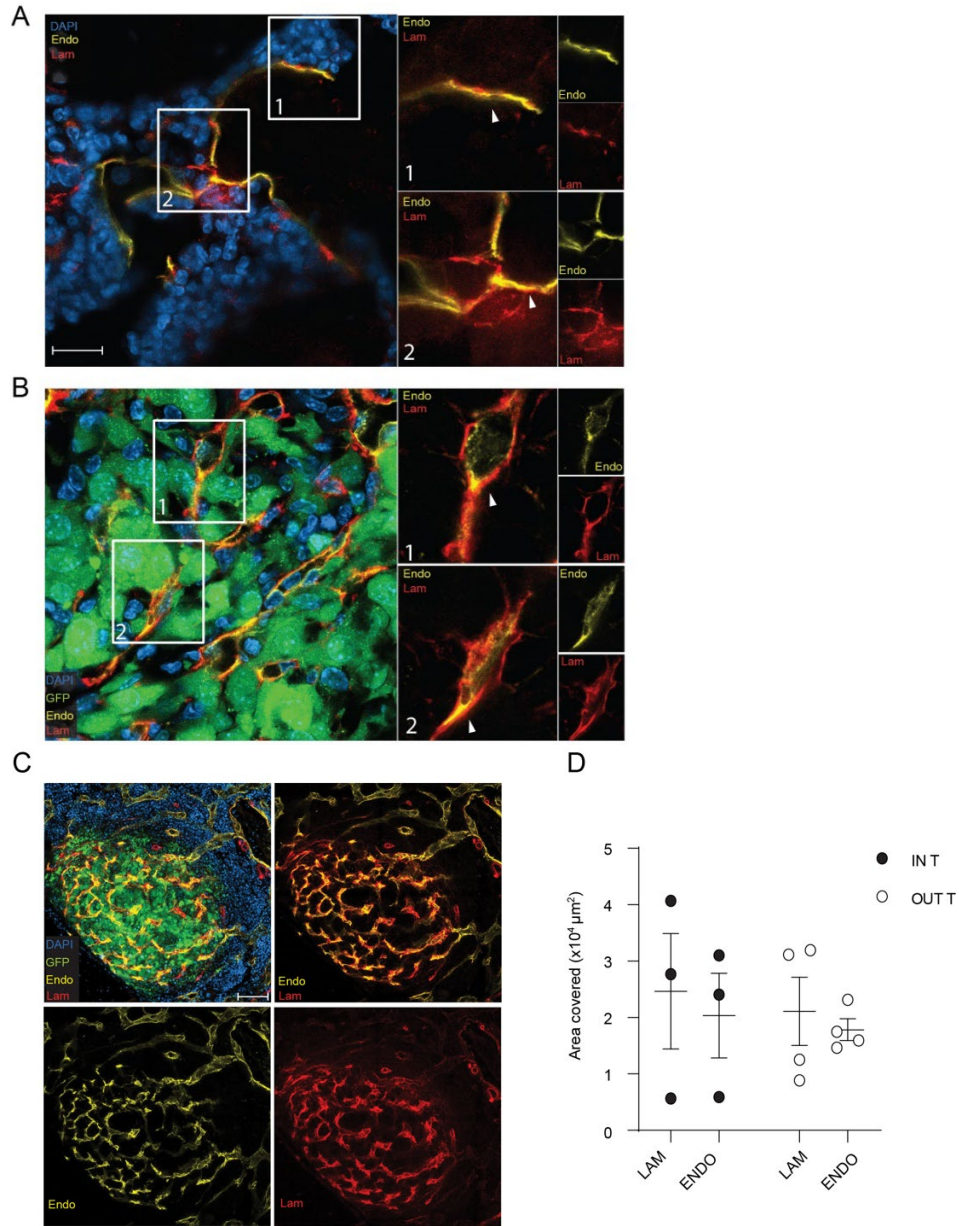

**Figure S1. Blood vessel marker expression in bone marrow and tumors. A, B)** Detection of bone marrow (A) and tumor (B) blood vessels by confocal acquisition; blue, DAPI; yellow, endomucin; red, laminin; green, tumor GFP; white boxes, magnifications reported on right panels; arrowhead, lack of physical overlap between markers; **C)** Immunofluorescence detection of blood vessels in VHL<sup>-</sup> RENCA bone tumors by confocal microscopy; blue, DAPI; yellow, endomucin; red, laminin; green, tumor GFP; **D)** Quantification of blood vessel area inside and outside tumor area based on laminin (red) and endomucin (yellow) signal, mean  $\pm$  SEM, n=3-4/group; blue, DAPI; green, GFP; arrowhead, blood vessels with only one marker expressed. Bar, 10  $\mu\text{m}$ . Endo-endomucin; Lam-laminin; IN T-inside tumor; OUT T-outside tumor.
