# Supplementary material for: Antiangiogenic Tyrosine Kinase Inhibitors have Differential Efficacy in Clear Cell Renal Cell Carcinoma in Bone
Source: PubMed Central journal article supplement (PMC11459607; doi:10.1158/2767-9764.crc-24-0304), 2024-10-08
Supplement: crc-24-0304_figure_s2_suppsf2.pdf [file crc-24-0304_figure_s2_suppsf2.pdf]

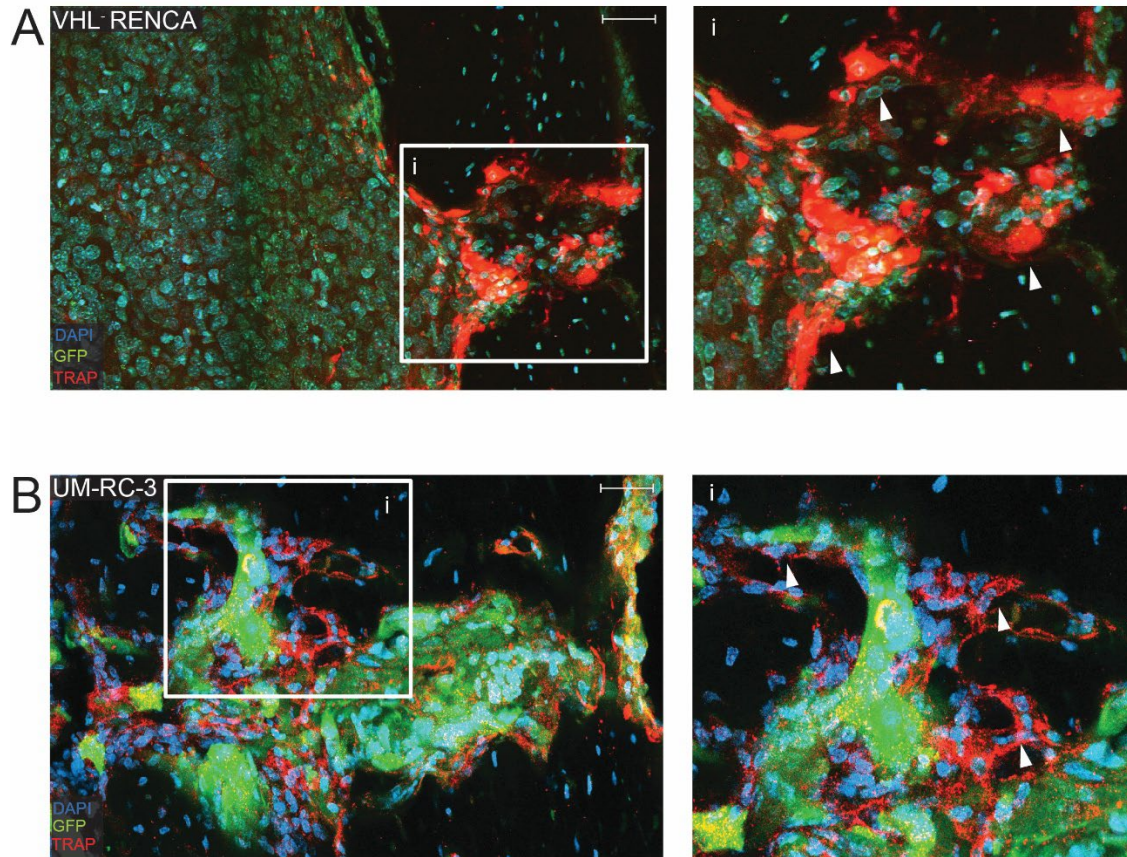

**Figure S2. Osteoclast recruitment and bone disruption.** **A)** RENCA VHL<sup>-</sup> cells (green, GFP); osteoclasts (red, TRAP); nuclei (blue, DAPI); white arrowhead, TRAP<sup>+</sup> cells. Bar, 50 μm; **B)** UM-RC-3 (green, GFP); osteoclasts (red, TRAP); nuclei (blue, DAPI); white arrowhead, TRAP<sup>+</sup> cells. Bar, 50 μm. Images captured by confocal microscope. TRAP-tartrate-resistant acid phosphatase. White rectangle, (i); magnification.
