# Supplementary material for: Antiangiogenic Tyrosine Kinase Inhibitors have Differential Efficacy in Clear Cell Renal Cell Carcinoma in Bone
Source: PubMed Central journal article supplement (PMC11459607; doi:10.1158/2767-9764.crc-24-0304), 2024-10-08
Supplement: crc-24-0304_figure_s6_suppsf6.pdf [file crc-24-0304_figure_s6_suppsf6.pdf]

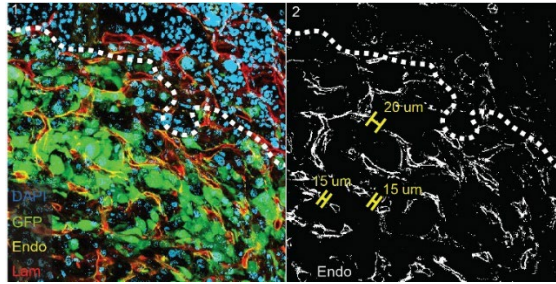

**Figure S6. Blood vessel distance analysis in bone tumors.** (1) Representative images of bone (VHL<sup>-</sup> RENCA) tumors captured by confocal microscope; tumor cells (green, GFP); blood vessels (yellow, endomucin; red, laminin), nuclei (blue, DAPI); (2) single endomucin channel and examples of measures (yellow bar lines) of blood vessel distance calculated in **Fig. 3 D, F**; dotted line, the area of tumor. Endo-endomucin; Lam-laminin.
