# Supplementary material for: Antiangiogenic Tyrosine Kinase Inhibitors have Differential Efficacy in Clear Cell Renal Cell Carcinoma in Bone
Source: PubMed Central journal article supplement (PMC11459607; doi:10.1158/2767-9764.crc-24-0304), 2024-10-08

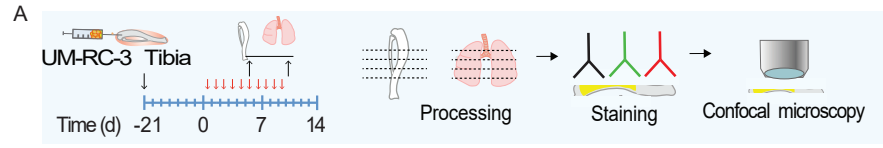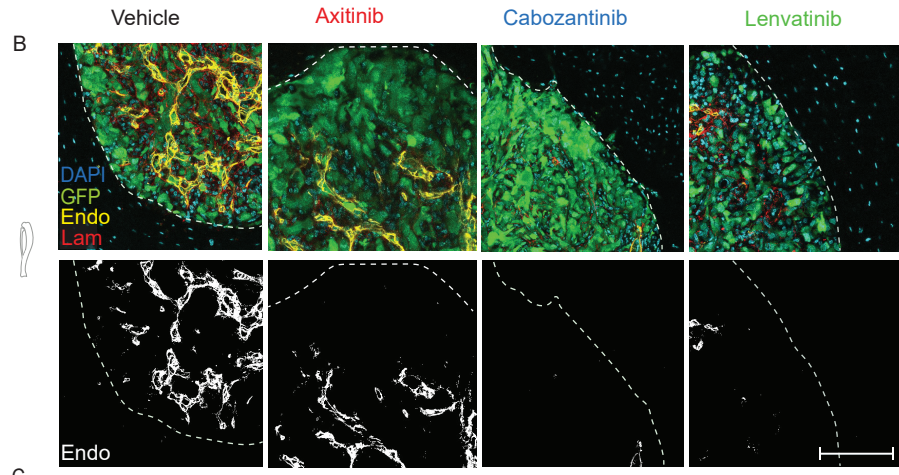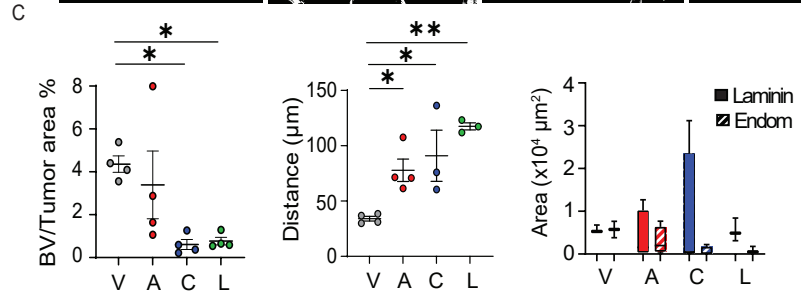

Supplement: crc-24-0304_figure_s7_suppsf7.pdf [file crc-24-0304_figure_s7_suppsf7.pdf]
