# Supplementary material for: Antiangiogenic Tyrosine Kinase Inhibitors have Differential Efficacy in Clear Cell Renal Cell Carcinoma in Bone
Source: PubMed Central journal article supplement (PMC11459607; doi:10.1158/2767-9764.crc-24-0304), 2024-10-08
Supplement: crc-24-0304_figure_s11_suppsf11.pdf [file crc-24-0304_figure_s11_suppsf11.pdf]

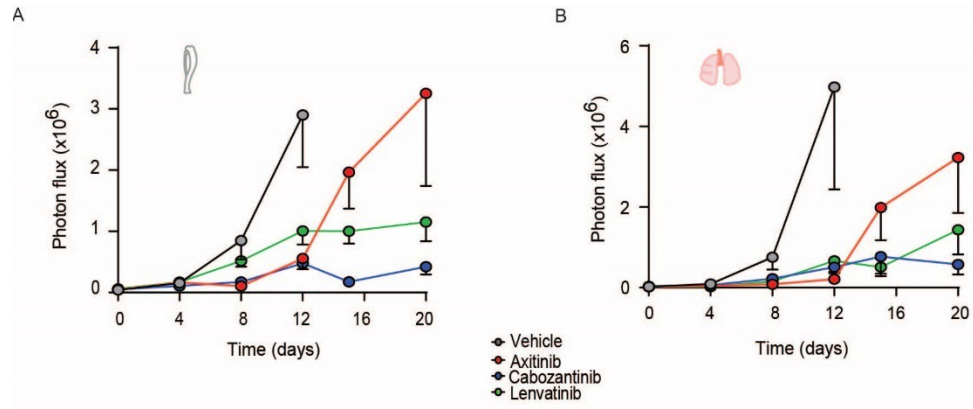

**Figure S11. *In vivo* efficacy of TKIs in VHL<sup>-</sup> RENCA model over 20 days. A, B) Response to TKIs in bone (A) and lung (B) tumors detected by bioluminescence, mean  $\pm$  SEM, n=8-16/group.**
